# Supplementary material for: Widespread Polycistronic Transcripts in Fungi Revealed by Single-Molecule mRNA Sequencing
Source: PubMed Central journal article supplement (PMC4503453; doi:10.1371/journal.pone.0132628), 2015-07-15
Supplement: pone.0132628.s002.pdf [file pone.0132628.s002.pdf]

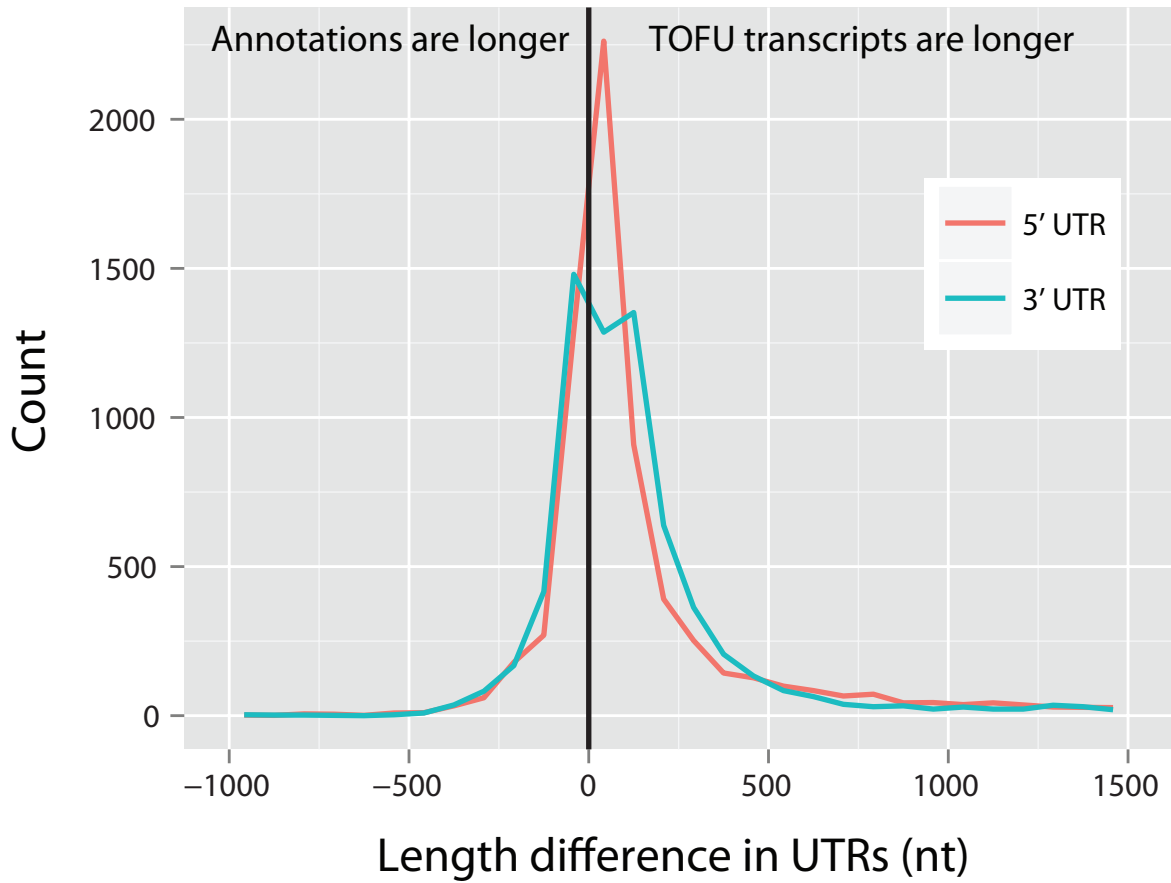

Figure A. Most of the TOFU transcripts have longer UTRs than current annotation.

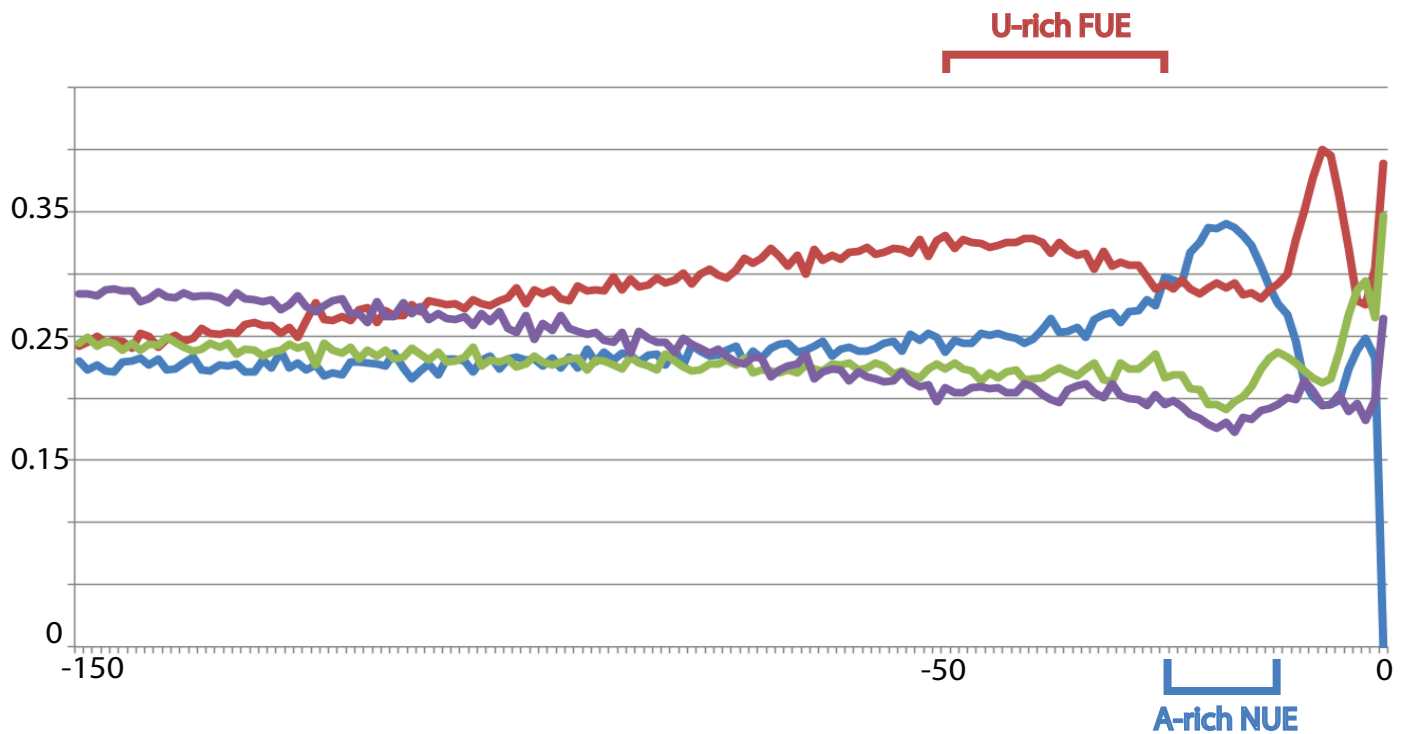

Figure B. Genome-wide analysis of the transcription termination signals in *P. crispa*. Average nucleotide composition was plotted for all non-polycistronic ToFU transcripts upstream of the poly-adenylation site. A-rich NUE and U-rich FUE elements are indicated. Green represents C-content and purple represent G-content, respectively. X-axis indicates the distance to polyA site.
